# Supplementary material
Source: PubMed Central journal article supplement (PMC5961181)
Supplement: mdy074_online_supplementary_material.pdf [file mdy074_online_supplementary_material.pdf]

Online supplementary material for the paper: Combined pathologic-genomic algorithm for early stage breast cancer improves cost-effective use of the 21-gene recurrence score assay.

W. C. Mylander<sup>2</sup>; M. Rosman<sup>2</sup>; M. M. Gage<sup>1</sup>; T. Fujii<sup>3</sup>; F. Le Du<sup>3</sup>; A. Raghavendra<sup>3</sup>; A. K. Sinha<sup>3</sup>; J. R. Espinosa Fernandez<sup>3</sup>; A. James<sup>3</sup>; N. T. Ueno<sup>3</sup>; L. Tafra<sup>2</sup>; R. S. Jackson<sup>2</sup>

1. Department of Surgery, Johns Hopkins Hospital, Baltimore, MD, USA
2. The Rebecca Fortney Breast Center, Anne Arundel Medical Center, Annapolis, MD, USA
3. Department of Breast Medical Oncology, The University of Texas MD Anderson Cancer Center, Houston, TX, USA

### ***Introduction***

This supplement contains information about the group of patients studied in the published paper. The next section displays the Kaplan-Meier curves used in producing the 5-year distant recurrence rates (DRR) reported in the paper. Those graphs are followed by information that is known about the adjuvant therapies given to the patients along with discussion of the context of these data. It then addresses the question of whether the P-G Algorithm, compared to the 21-gene assay, leads to under- or over-treatment of some patients. A discussion of low PR percentage staining as a marker of a poor prognosis is given. These findings support our recommendation that the AAMC Model's definition for low risk be changed to grade 1 and PR >3-5%. Lastly, a table is provided that gives the key characteristics of the patients studied.

**Kaplan-Meier Curves** Figure S1 shows the Kaplan-Meier curves for freedom from distant metastasis for the four models presented in this paper. The 5-year point is the focus of the results presented.

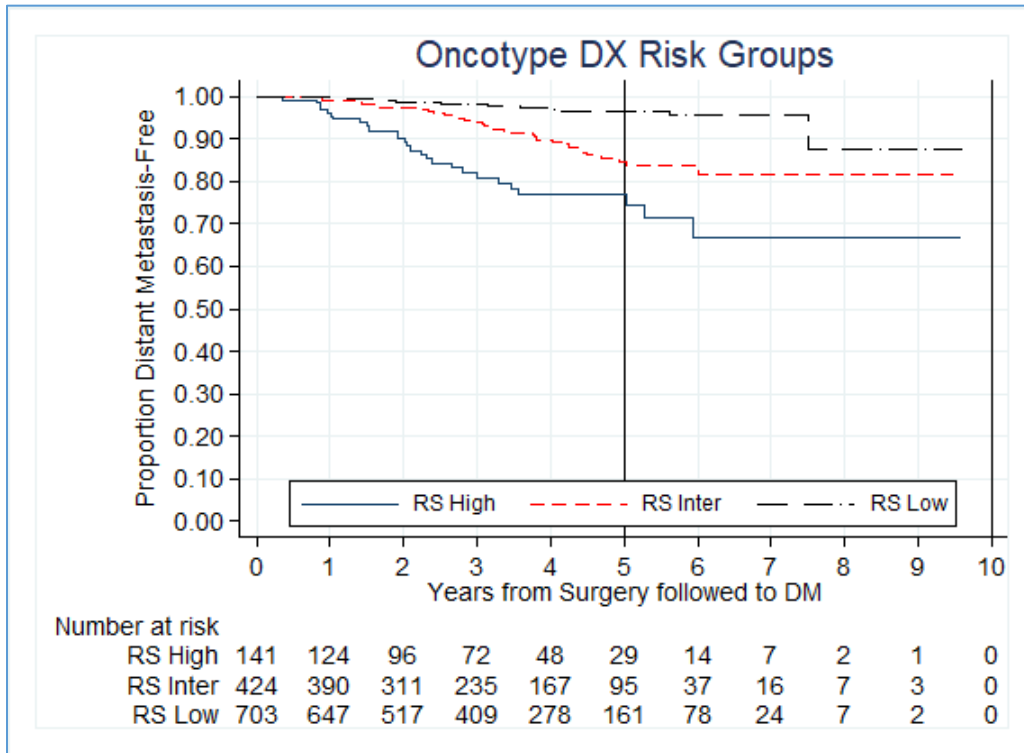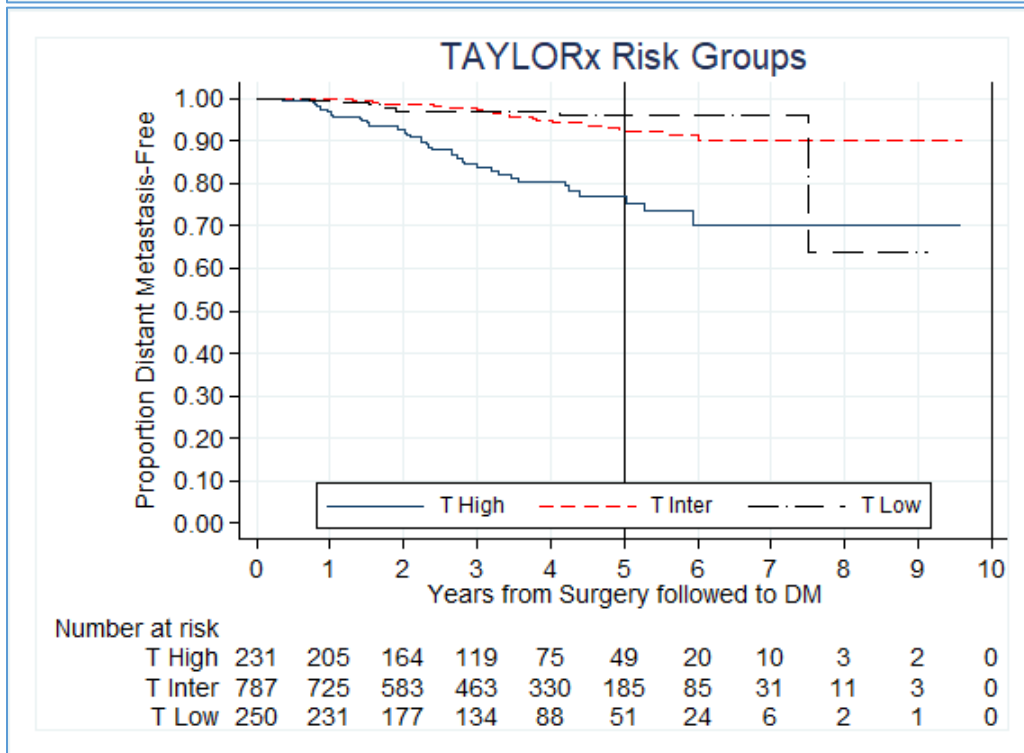

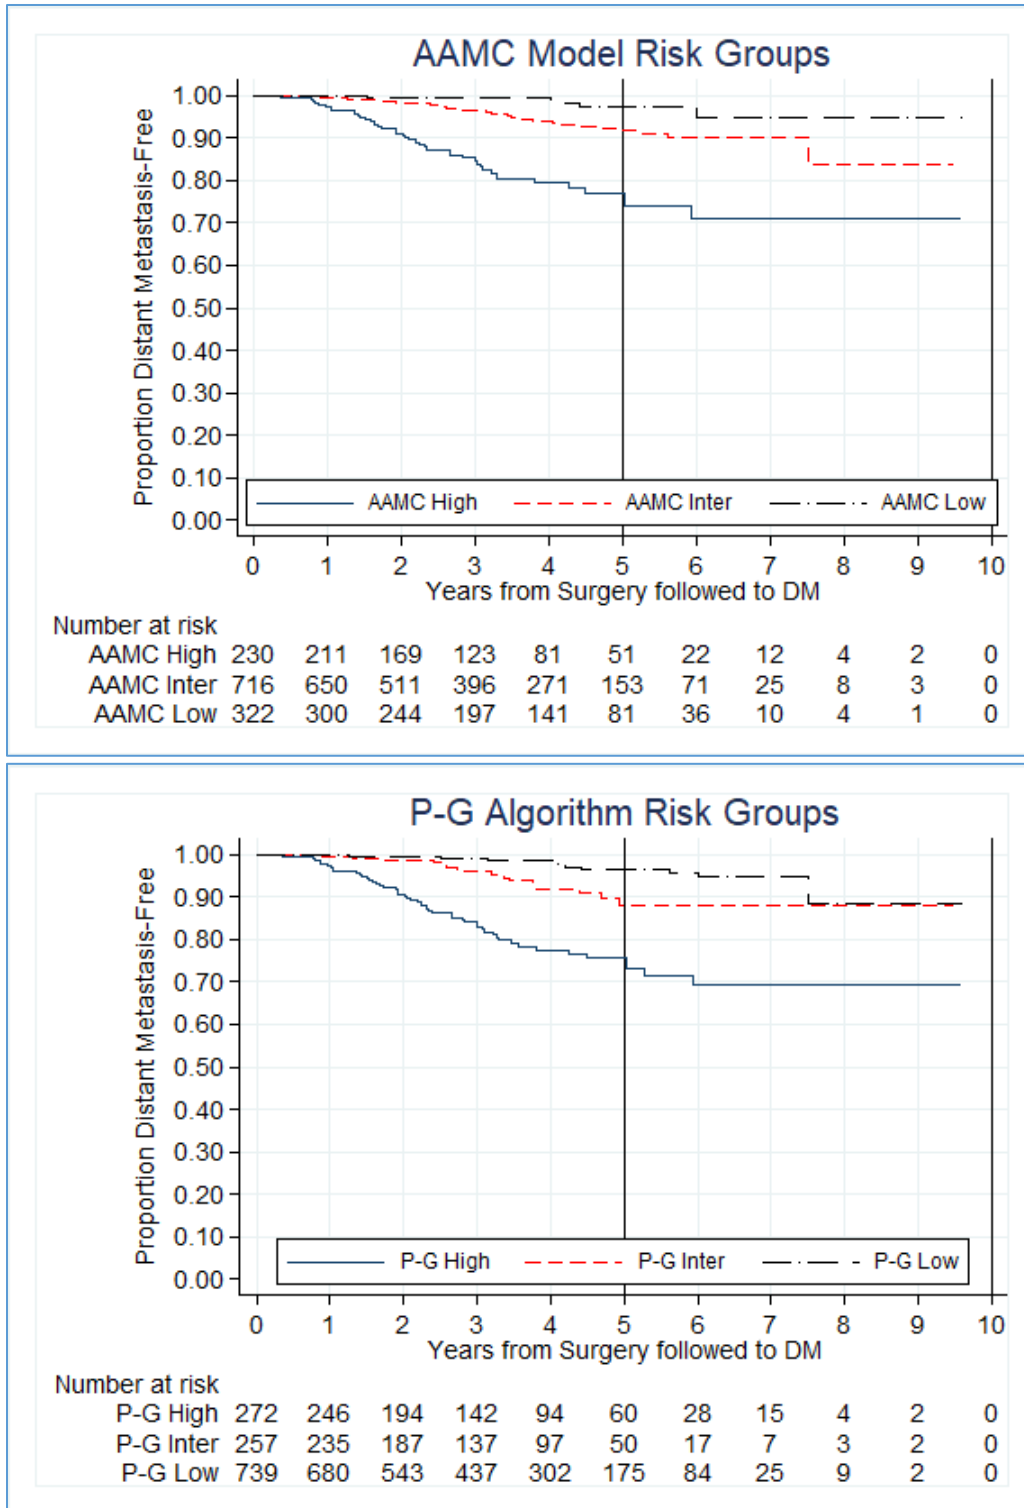

Figure

S1. Kaplan-Meier survival curves by model: RS assay, TAILORx, AAMC, and P-G Algorithm. RS= Recurrence Score, T= TAILORx, AAMC= Anne Arundel Medical Center, P-G = Pathologic-Genomic Algorithm.

**Knowledge of the Study Group’s Adjuvant Therapies**

Knowledge of the adjuvant therapies received by study patients was not central to the thesis of the paper. The source of information about the adjuvant therapies is the MD Anderson’s Cancer Registry, and as such there are inherent limitations. For patients receiving chemotherapy within the MD Anderson system, documentation of receipt of chemotherapy indicates that the patient received adjuvant chemotherapy and completed at least the majority of the intended treatment. For patients receiving adjuvant treatment outside of MD Anderson, documentation of receipt of chemotherapy indicates that the Cancer Registry learned that the patient started chemotherapy, but does not indicate that the majority of the course was completed. The data on receipt of adjuvant hormonal therapy is more problematic. The Cancer Registry records only a single entry, yes or no, for receipt of hormonal therapy. Receipt of adjuvant therapy is recorded if the patient started therapy; duration and compliance are not documented. For patients treated outside of the MD Anderson system, data on both chemotherapy and hormonal therapy are more likely to be incomplete. Recognizing these limitations, the known data on adjuvant chemotherapy (Table S1) and adjuvant hormonal therapy (Table S2) are presented below.

Table S1: RS Risk Groups by Adjuvant Chemo Treatment Status

| Count<br>Row % | N             | Y             |      |
|----------------|---------------|---------------|------|
| RS High        | 28<br>19.86%  | 113<br>80.14% | 141  |
| RS Inter       | 222<br>54.01% | 189<br>45.99% | 411  |
| RS Low         | 681<br>96.87% | 22<br>3.13%   | 703  |
|                | 931           | 324           | 1255 |

$28/141=19.9\%$

Table S2: RS Risk Groups by Adjuvant Hormone Treatment Status

| Count<br>Row % | N            | Y             |      |
|----------------|--------------|---------------|------|
| RS High        | 36<br>25.53% | 105<br>74.47% | 141  |
| RS Inter       | 61<br>14.39% | 363<br>85.61% | 424  |
| RS Low         | 67<br>9.53%  | 636<br>90.47% | 703  |
|                | 164          | 1104          | 1268 |

$164/1268=12.9\%$   $(67+61)/(703+424)=11.3\%$

**Characteristics of the 21-gene Low and High Risk patients that recurred.**

Table S3 below is an expanded version of Table 2 in the paper with the additional columns reporting whether the database records a patient began chemotherapy (“Y”) or hormone therapy (“Y”). Table S4 gives more information about the 21-gene high risk group than is reported in the section entitled “Cases Defined as High Risk” of the paper.

Table S3. Characteristics of all cases defined as Low Risk by RS assay criteria which experienced distant metastasis. The TAILORx low-risk cases are above the bold line. Low PR and high grade cases are highlighted.

| RS | AAMC Risk    | ER% | PR%            | Grade | T Stage | Years to Metastasis | Adj Chemo | Adj Hormone |
|----|--------------|-----|----------------|-------|---------|---------------------|-----------|-------------|
| 1  | Unknown      | 95  | Negative (<10) | 1     | T1c     | 1.5                 | N         | Y           |
| 6  | High         | 100 | 100            | 3     | T1c     | 1.7                 | N         | Y           |
| 9  | Intermediate | 96  | 96             | 2     | T3      | 1.7                 | N         | Y           |
| 9  | Intermediate | 96  | 40             | 2     | T1b     | 0.7                 | N         | Y           |
| 9  | High         | 85  | 75             | 3     | T2      | 1.9                 | Y         | Y           |
| 9  | Intermediate | 98  | 50             | 2     | T2      | 7.5                 | N         | Y           |
| 10 | Intermediate | 95  | 60             | 2     | T1c     | 4.1                 | N         | N           |
| 10 | High         | 100 | 70             | 3     | T2      | 1.1                 | N         | Y           |
| 11 | Intermediate | 90  | 90             | 2     | T1c     | 2.5                 | N         | Y           |
| 13 | Intermediate | 100 | 50             | 2     | T1b     | 1.3                 | N         | Y           |
| 13 | Intermediate | 95  | 95             | 2     | T1c     | 2.8                 | N         | Y           |
| 14 | Intermediate | 75  | 75             | 2     | T2      | 5.6                 | N         | Y           |
| 14 | Intermediate | 90  | 60             | 2     | T1c     | 3.6                 | N         | N           |
| 15 | Intermediate | 90  | 2              | 2     | T1b     | 3.1                 | N         | Y           |
| 15 | Intermediate | 100 | 30             | 2     | T1c     | 4.0                 | N         | Y           |
| 17 | High         | 80  | 80             | 3     | T1c     | 2.2                 | N         | Y           |
| 17 | High         | 100 | 5              | 3     | T1c     | 3.3                 | N         | Y           |

Table S4. Characteristics of all cases defined as High Risk by TAILORx criteria which experienced distant metastasis. Low PR, low ER, and low grade cases are highlighted. The RS High-risk cases are below the bold line.

| RS | AAMC Risk     | ER% | PR% | Grade | Years to Metastasis | Adj Chemo | Adj Hormone |
|----|---------------|-----|-----|-------|---------------------|-----------|-------------|
| 26 | High          | 100 | 90  | 3     | 2.7                 | Y         | Y           |
| 26 | Indeterminate | 91  | 25  | 2     | 3.2                 | N         | Y           |
| 26 | Indeterminate | 50  | 20  | 2     | 2.7                 | N         | Y           |
| 27 | High          | 97  | 100 | 3     | 2.2                 | Y         | Y           |
| 27 | High          | 90  | 60  | 3     | 2.3                 | Y         | Y           |
| 28 | High          | 80  | 100 | 3     | 0.8                 | N         | N           |
| 28 | High          | 100 | 20  | 3     | 1.4                 | Y         | Y           |
| 28 | High          | 90  | 90  | 3     | 2.8                 | Y         | Y           |
| 28 | High          | 20  | 80  | 3     | 4.3                 | Y         | Y           |
| 29 | High          | 91  | 1   | 3     | 0.8                 | N         | N           |
| 29 | Indeterminate | 100 | 85  | 2     | 4.4                 | Y         | Y           |

|    |               |     |     |   |     |   |   |
|----|---------------|-----|-----|---|-----|---|---|
| 30 | Low           | 100 | 1   | 1 | 4.2 | Y | Y |
| 31 | Low           | 95  | 0   | 1 | 0.9 | N | N |
| 32 | High          | 80  | 80  | 3 | 2.3 | N | Y |
| 32 | High          | 67  | 33  | 3 | 1.0 | Y | Y |
| 32 | Indeterminate | 80  | 1   | 2 | 3.5 | Y | Y |
| 32 | Indeterminate | 90  | 100 | 2 | 1.9 | Y | Y |
| 32 | High          | 94  | 35  | 3 | 5.9 | N | Y |
| 33 | High          | 50  | 90  | 3 | 2.0 | Y | Y |
| 34 | Inter         | 95  | 0   | 2 | 1.5 | Y | N |
| 34 | High          | 35  | 40  | 3 | 1.4 | Y | Y |
| 34 | Indeterminate | 75  | 4.5 | 2 | 3.6 | Y | Y |
| 35 | High          | 81  | 71  | 3 | 1.0 | N | Y |
| 35 | High          | 70  | 20  | 3 | 2.1 | Y | Y |
| 36 | High          | 10  | 10  | 3 | 0.9 | Y | N |
| 36 | High          | 70  | 0   | 3 | 1.9 | Y | Y |
| 36 | Indeterminate | 95  | 11  | 2 | 5.3 | Y | Y |
| 36 | High          | 85  | 30  | 3 | 5.0 | Y | Y |
| 38 | High          | 90  | 70  | 3 | 0.4 | Y | Y |
| 38 | Indeterminate | 100 | 4.5 | 2 | 1.0 | Y | Y |
| 39 | High          | 98  | 40  | 3 | 2.6 | N | Y |
| 41 | Indeterminate | 90  | 3   | 2 | 2.2 | Y | Y |
| 41 | Indeterminate | 100 | 70  | 2 | 2.4 | Y | Y |
| 42 | High          | 90  | 90  | 3 | 0.8 | Y | Y |
| 45 | High          | 55  | 4.5 | 3 | 3.3 | Y | Y |
| 46 | High          | 99  | 5   | 3 | 3.0 | Y | Y |
| 46 | Indeterminate | 90  | 90  | 2 | 2.8 | Y | Y |
| 49 | High          | 100 | 1   | 3 | 2.0 | Y | Y |
| 56 | High          | 50  | 0.9 | 3 | 1.5 | Y | N |

### ***The Possibility of Over or Under Treatment When Using the P-G Algorithm Instead of Using RS***

There is concern that using the P-G Algorithm, rather than the 21-gene assay alone, could lead to under- or over-treatment. In the study group, no patients were P-G Algorithm low risk but RS high risk. Such cases would likely be very rare in practice. (Table S5).

The P-G Algorithm does categorize more patients as high-risk than the 21-gene assay alone; these additional patients nearly all have grade 3 tumors. We suggest that these additional patients will, in fact, benefit from chemotherapy, as their risk of 5-year distant recurrence exceeds 7%. The Paik *et al.*, Figure 3 shows that the 10-year risk of distant recurrence was about 15% for Poorly Differentiated, RS Low risk patients [11]. Since the DRR for the Low risk patient increased almost linearly (as shown in Figure 2), we estimate that the 5-year DRR would be close to 7%.

Of the 272 patients in the P-G Algorithm's high risk group, 52 were RS low risk patients. Of these 52, 5 (5/52=9.6%) experienced a distant recurrence, and 4 out of these 5 did not have a record of receiving adjuvant chemotherapy. We suggest that, with a recurrence rate of 9.6%, the RS low risk patients with

grade 3 tumors (who were thus assigned to the P-G Algorithm's high risk group) were put at risk by not being offered chemotherapy.

There were 79 patients classified as P-G Algorithm high risk and RS intermediate risk. In this group, 19 (19/79=24.1%) experienced a distant recurrence. Only 8 of these 19 are recorded as having received adjuvant chemotherapy.

Of the 88 patients classified as P-G Algorithm low risk and RS intermediate risk there were 4 that had a distant recurrence. Only 1 of the 4 was recorded as having gotten chemotherapy; she was PR=1% and had a RS=30. Two the 4 had PR=1%, which supports the need to change our low risk rule to put very low PR percentage cases into the AAMC intermediate risk group to get a 21-gene test.

Table S5. P-G Algorithm Risk Groups by RS Assay Risk Groups

| Count<br>Total %<br>Col %<br>Row % | RS Assay<br>High                   | RS Assay<br>Inter                  | RS Assay<br>Low                   |               |
|------------------------------------|------------------------------------|------------------------------------|-----------------------------------|---------------|
| P-G Algorithm High                 | 141<br>11.12%<br>100.00%<br>51.84% | 79<br>6.23%<br>18.63%<br>29.04%    | 52<br>4.10%<br>7.40%<br>19.12%    | 272<br>21.45% |
| P-G Algorithm Inter                | 0<br>0.00%<br>0.00%<br>0.00%       | 257<br>20.27%<br>60.61%<br>100.00% | 0<br>0.00%<br>0.00%<br>0.00%      | 257<br>20.27% |
| P-G Algorithm Low                  | 0<br>0.00%<br>0.00%<br>0.00%       | 88<br>6.94%<br>20.75%<br>11.91%    | 651<br>51.34%<br>92.60%<br>88.09% | 739<br>58.28% |
|                                    | 141<br>11.12%                      | 424<br>33.44%                      | 703<br>55.44%                     | 1268          |

### ***The Prognostic Significance of PR***

The significance of PR has been demonstrated in recent literature [1-5]. The prognostic significance of quantitative PR is also demonstrated in established models such as the IHC4 [6] and the Magee equations for predicting RS scores [7]. In the present study, 22% of recurrences had PR <3%. Chaudhary et al. demonstrated that patients with negative PR were more likely to have higher RS assay scores [8]. The present study found that 18% of RS assay low-risk cases that recurred had PR <10%, suggesting that low PR is important prognostically, regardless of RS score. Clark *et al.* corroborates our assertion that grade 1 PR negative tumors are not low risk tumors. They report that all the case of RS>30 that were grade 1 had low PR values with a median value of 0 [9].

Although the AAMC Model uses negative PR as a risk criterion, the *post hoc* analysis in the present study suggests that not only negative PR, but very low PR, predicts recurrence. For example, among cases that recurred, all those with PR <3% recurred within 5 years, with an average time to distant recurrence of 2.3 years. The significance of very low PR in addition to negative PR may be partially due to inter-

observer variability in PR scoring among pathologists. Cohen *et al.* demonstrated that focal weak expression of a few tumor cells is reported by some pathologists as PR<1%, whereas others report PR≥1% [10].

Based on these findings, we suggest that in the future using the rule that only grade 1 tumors with a PR percent less than 3% (or, for the more risk-adverse, less than 5%) be considered low risk in the AAMC model contained in the P-G Algorithm.

### ***Characteristics of the Study Group***

Table S6: Table of characteristics of the studied group of patients.

| Characteristic | Number (%)  |            |
|----------------|-------------|------------|
| Population     | 1268 (100)  |            |
| Mean Age at DX |             | 54.8 years |
| Tumor Type     |             |            |
| IDC            | 1029 (81.2) |            |
| IDC&ILC        | 76 (6.0)    |            |
| ILC            | 127 (10.0)  |            |
| Other          | 36 (2.8)    |            |
| Tumor Size     |             |            |
| T1a & mic      | 29 (2.3)    |            |
| T1b            | 275 (21.7)  |            |
| T1c            | 640 (50.5)  |            |
| T2             | 304 (24.0)  |            |
| T3             | 20 (1.6)    |            |
| Grade          |             |            |
| 1              | 337 (26.6)  |            |
| 2              | 706 (55.7)  |            |
| 3              | 225 (17.7)  |            |



| Characteristic    | Number (%)  |       |
|-------------------|-------------|-------|
| <b>ER%</b>        |             |       |
| Mean              |             | 89.5% |
| Std Dev           |             | 16.6% |
| ER%<20%           | 17 (1.3)    |       |
| ER%≥20%           | 1251 (98.7) |       |
| <b>PR%</b>        |             |       |
| Mean              |             | 65.4% |
| Std Dev           |             | 36.2% |
| PR%<3%            | 122 (9.6)   |       |
| PR%≥3%            | 1146 (90.4) |       |
| <b>HER2</b>       |             |       |
| 0                 | 498 (39.3)  |       |
| 1+                | 496 (39.1)  |       |
| 2+ & (FISH Neg)   | 175 (13.8)  |       |
| Negative          | 99 (7.8)    |       |
| <b>Ki67</b>       |             |       |
| Mean              |             | 19.3% |
| Std Dev           |             | 17.5% |
| <b>RS</b>         |             |       |
| RS<11             | 250 (19.7)  |       |
| RS 11-17          | 453 (35.7)  |       |
| RS 18-25          | 334 (26.3)  |       |
| RS 26-30          | 90 (7.1)    |       |
| RS>30             | 141 (11.1)  |       |
| <b>AAMC Model</b> |             |       |

| Characteristic       | Number (%) |  |
|----------------------|------------|--|
| Low Risk             | 322 (25.4) |  |
| Intermediate         | 716 (56.5) |  |
| High Risk            | 230 (18.1) |  |
| <b>P-G Algorithm</b> |            |  |
| Low Risk             | 739 (58.3) |  |
| Intermediate         | 257 (20.3) |  |
| High Risk            | 272 (21.4) |  |

### References

1. Orucevic A, Bell JL, McNabb AP, Heidel RE. Oncotype DX breast cancer recurrence score can be predicted with a novel nomogram using clinicopathologic data. *Breast Cancer Res Treat.* 2017 May;163(1):51-61.
2. Briskin C. Progesterone signaling in breast cancer: a neglected hormone coming into the limelight. *Nat Rev Cancer.* 2013 Jun;13(6):385-96.
3. Ono M, Tsuda H, Yoshida M, et al. Prognostic Significance of Progesterone Receptor Expression in Estrogen-Receptor Positive, HER2-Negative, Node-Negative Invasive Breast Cancer with a Low Ki-67 Labeling Index. *Clin Breast Cancer.* 2017;17(1):41-47.
4. Tang P, Wang J, Hicks DG, et al. A lower Allred score for progesterone receptor is strongly associated with a higher recurrence score of 21-gene assay in breast cancer. *Cancer Invest.* 2010;28:978-982.
5. He Z-Y, Sun J-Y, Li F-Y, et al. Progesterone receptor loss identifies hormone receptor-positive and HER2-negative breast cancer subgroups at higher risk of relapse: a retrospective cohort study. *OTT.* 2016:1707. doi:10.2147/OTT.S98666.
6. Cuzick J, Dowsett M, Pineda S, et al. Prognostic value of a combined estrogen receptor, progesterone receptor, Ki-67, and human epidermal growth factor receptor 2 immunohistochemical score and comparison with the Genomic Health recurrence score in early breast cancer. *J Clin Oncol.* 2011;29(32):4273-8.
7. Klein ME, Dabbs DJ, Shuai Y, et al. Prediction of the Oncotype DX recurrence score: use of pathology-generated equations derived by linear regression analysis. *Modern Pathology.* 2013:1-7
8. Chaudhary LN, Jawa Z, Szabo A, et al. Relevance of progesterone receptor immunohistochemical staining to Oncotype DX recurrence score. *Hematology/Oncology and Stem Cell Therapy.* 2016;9(2):48-54.

9. Clark, BS, Dabbs DJ, Cooper KL, Bhargava R. Impact of progesterone receptor semiquantitative immunohistochemical result on Oncotype DX recurrence score: a quality assurance study of 1074 cases. *Appl Immunohistochem Mol Morphol*. 2013 Jul;21(4):287-91.
10. Cohen DA, Dabbs DJ, Cooper KL, et al. Interobserver agreement among pathologists for semiquantitative hormone receptor scoring in breast carcinoma. *Am J Clin Pathol*. 2012 Dec;138(6):796-802.
11. Paik S, Shak S, Tang G, et al. A Multigene Assay to Predict Recurrence of Tamoxifen-Treated, Node-Negative Breast Cancer. *N Engl J*. 2004:2817-2826.
